# Supplementary material
Source: Springer Nature journal article supplement (https://www.springermedizin.de/resource/supplementary/12906_2001_9_MOESM4_ESM.pdf/9519328)

- CaCl<sub>2</sub>-Ca d Sulph-30
- CaCl<sub>2</sub>-Alc-30
- CaCl<sub>2</sub>-Ca d Sulph-200
- CaCl<sub>2</sub>-Alc-200

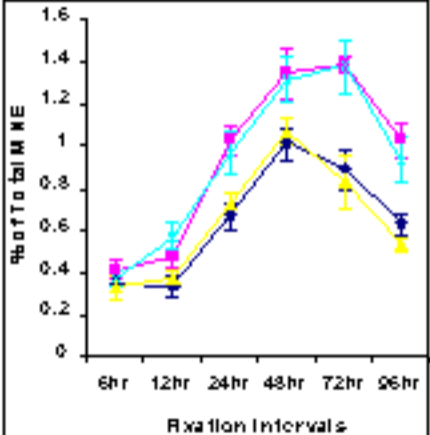

Supplement: MOESM4 [file 9519328]
